# Supplementary material for: Iron oxide nanozymes enhanced by ascorbic acid for macrophage-based cancer therapy
Source: Royal Society of Chemistry journal article supplement (doi:10.1039/d4nr01208a), 2024-01-01
Supplement: d4nr01208a1.pdf [file d4nr01208a1.pdf]

Electronic Supplementary Material (ESI) for Nanoscale.  
This journal is © The Royal Society of Chemistry 2024

## Supporting Information

### **Iron Oxide Nanozymes Enhanced by Ascorbic Acid for Macrophage-Based Cancer Therapy**

Zhongchao Yi,<sup>a</sup> Xiaoyue Yang,<sup>a</sup> Ying Liang,<sup>b</sup> and Sheng Tong<sup>\*a</sup>

<sup>a</sup> Department of Biomedical Engineering, University of Kentucky, Lexington, Kentucky 40536, United States.

<sup>b</sup> New York Blood Center, New York, New York 10065, USA.

## Supporting Figures

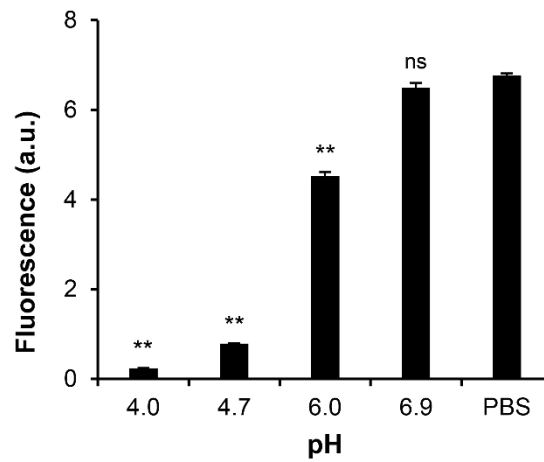

**Figure S1. pH-dependency of Amplex Red.** The Amplex Red generated in a peroxidase reaction was diluted 10 times by buffers of different pH levels. After dilution, fluorescence intensity was measured with a microplate reader. Data represents mean  $\pm$  standard deviation ( $n = 3$ ). \*\*,  $p < 0.01$  and ns, not significant vs. PBS.

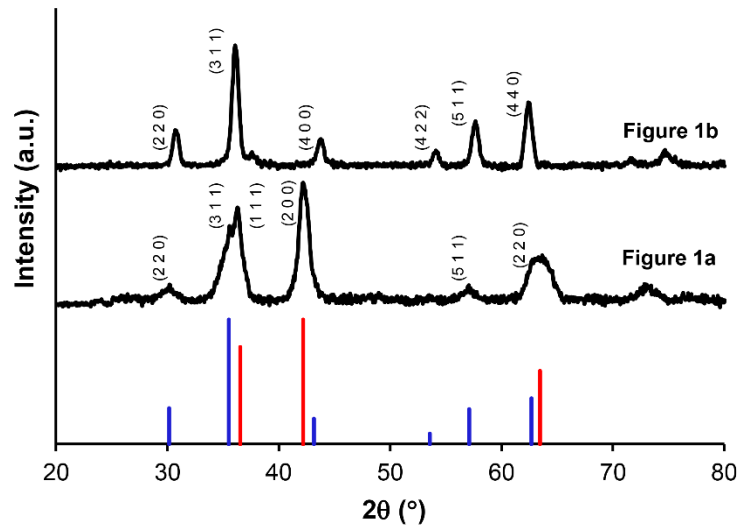

**Figure S2. XRD patterns of nanocrystals shown in Figures 1a and 1b.** Red and blue lines label the standard peaks of wüstite (PDF NO. 01-073-2144) and magnetite (PDF NO. 01-071-6336), respectively.

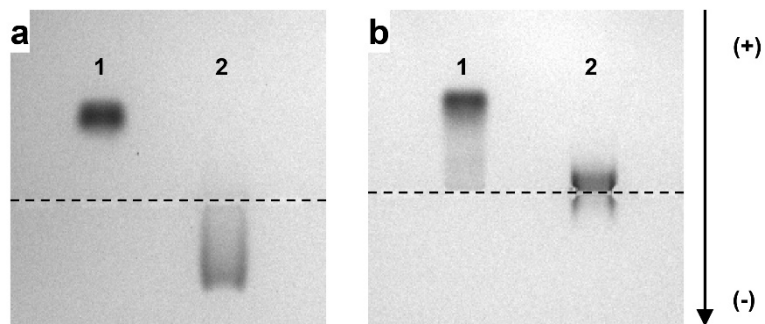

**Figure S3. Gel electrophoresis of IONPs.** WNPs and MNPs with and without TAT peptides were analyzed with gel electrophoresis in 0.6 % agarose gel. **a.** WNPs without TAT peptide (1) and with TAT peptide (2). **b.** MNPs without TAT peptide (1) and with TAT peptide (2). The “+” and “-” indicate anode and cathode in gel electrophoresis respectively.

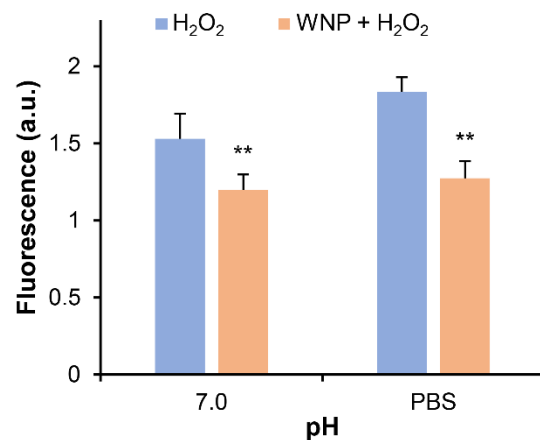

**Figure S4. WNP catalysis at neutral pH.** WNPs (20  $\mu\text{g Fe/mL}$ ) were added to a mixture of Amplex Red (50  $\mu\text{M}$ ), HRP (0.5 mU), and H<sub>2</sub>O<sub>2</sub> (10  $\mu\text{M}$ ) in a 96-well plate. After 30 minutes of incubation, the fluorescence was measured with a microplate reader. Data represent mean  $\pm$  standard deviation (n = 3). \*\*, p < 0.01.

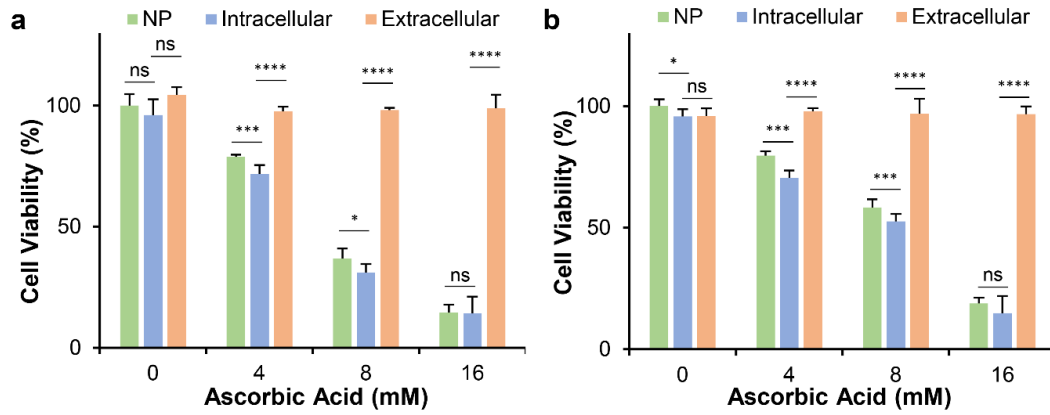

**Figure S5. Cytotoxicity of ascorbic acid and MNPs.** 4T1 (a) and RAW 264.7 cells (b) were treated with ascorbic acid alone or in the presence of intracellular or extracellular MNPs. Data represent mean  $\pm$  standard deviation (n = 4).

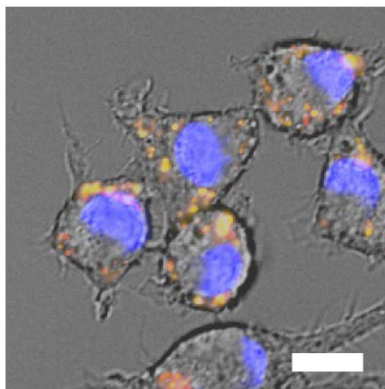

**Figure S6. Intracellular distribution of IONPs.** The brightfield and fluorescence images shown in Figure 3c were merged. Scale bar: 10  $\mu\text{m}$ .

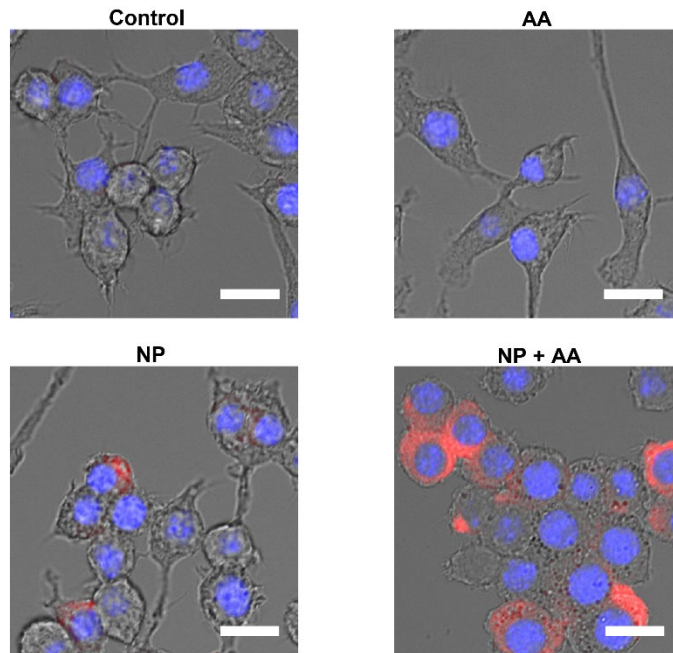

**Figure S7. Expression of CD86 by RAW 264.7 cells.** The fluorescence images shown in Figure 4d are merged with bright field images. Scale bar: 10 μm.



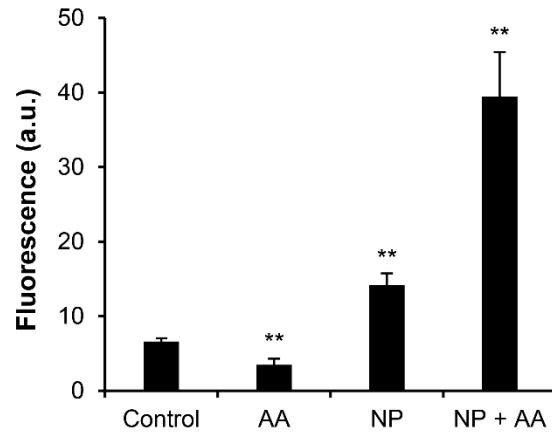

**Figure S8. Expression of CD86 by RAW 264.7 cells.** Fluorescence intensity was quantified using flow cytometry. Data represents mean  $\pm$  standard deviation (n = 3). \*\*, p < 0.01 vs. Control.

## Supporting Tables

**Table S1. Primers used for RT-qPCR gene expression analysis**

| <b>Gene</b>   | <b>Forward primer</b> | <b>Reverse primer</b> |
|---------------|-----------------------|-----------------------|
| GAPDH         | GCATCTTCTTGTGCAGTGCC  | ACTGTGCCGTTGAATTTGCC  |
| Arg-1         | AACCAGCTCTGGGAATCTGC  | TCCATCACCTTGCCAATCCC  |
| CD206         | GTCAGAACAGACTGCGTGGA  | AGGGATCGCCTGTTTTCCAG  |
| iNOS          | GCCCAGCCAGCCCAAC      | CTCAATGGCATGAGGCAGGA  |
| CD86          | ACGGACTTGAACAACCAGACT | CGTCTCCACGGAAACAGCAT  |
| TNF- $\alpha$ | CAGTTCTATGGCCCAGACCC  | TAGCAAATCGGCTGACGGTG  |
| TGF- $\beta$  | CTGCTGACCCCCACTGATAC  | ATGTCATGGATGGTGCCCAG  |

**Table S2. Characterization of DSPE-PEG-coated iron oxide nanoparticles.**

|     | <b>Core Size (nm)</b> | <b>Hydrodynamic Size (nm)</b> | <b>Polydispersity (%)</b> |
|-----|-----------------------|-------------------------------|---------------------------|
| WNP | 7.8 ± 0.8             | 22.0 ± 0.5                    | 25.2                      |
| MNP | 15.4 ± 1.3            | 30.9 ± 0.9                    | 19.9                      |

**Table S3. Kinetics of IONP-mediated Fenton reaction**

|             | <b><math>V_{\max}</math> (nM S<sup>-1</sup>)</b> | <b><math>K_m</math> (μM)</b> |
|-------------|--------------------------------------------------|------------------------------|
| WNP         | 146.2                                            | 156.5                        |
| MNP         | 42.9                                             | 179.2                        |
| Ferumoxytol | 35.9                                             | 395.6                        |

The concentration of all IONPs was fixed at 20 μg Fe/mL.
